# Supplementary material for: High level potential energy surface and mechanism of Al(CH3)2OCH3-promoted lactone polymerization: initiation and propagation
Source: Royal Society of Chemistry journal article supplement (doi:10.1039/c7cp00809k), 2017-01-01
Supplement: c7cp00809k2.dat [file c7cp00809k2.dat]

### Text file with xyz coordinates of all stationary points.


## Glycolide + Al(CH3)2OCH3


#Glycloide monomer
  O   -2.61841444711529      0.14445685666087      0.10303421328296
  O   2.55685024349393      0.02419021070599      0.60240933745111
  C   -0.54014093434876      1.12164244131907     -0.52839178607584
  C   0.58105307523387     -1.21750152147582      0.12147507230133
  C   -1.43089922924590      0.03838737668858      0.03181494955265
  C   1.40322388064094      0.03897585423294      0.29285221665955
  O   -0.80042960588867     -1.07378567638580      0.44525980034151
  O   0.75293962914586      1.19313698035446      0.06556148292786
  H   -0.44869584727825      0.97439684848604     -1.61060835497602
  H   -1.01674452826665      2.08112504900132     -0.35089784655317
  H   0.69064789232377     -1.57510420400685     -0.90825761049569
  H   0.97790687130515     -1.97754021558081      0.78681952558374

#Al(CH3)2OCH3
  Al  0.21534075294983     -0.01506606979347     -0.01259769487839
  C   -0.16895977704575      0.10736038330098      1.89872310180996
  C   2.00004784961754     -0.13583066983475     -0.77744426927594
  O   -1.06569296077723     -0.02227057940506     -1.12438305207843
  C   -2.45603267152786      0.03850573139765     -1.01480484242922
  H   1.99496131217310      0.03758439655393     -1.85577116910454
  H   2.68847461698459      0.58059485595134     -0.32271323039587
  H   2.42976671079960     -1.12763511047751     -0.60174600372101
  H   -0.96086579942842     -0.57882810326609      2.20709312207094
  H   0.71650406630064     -0.11604806572781      2.49902644254337
  H   -0.50543958171707      1.11322242119345      2.17048017307061
  H   -2.85810387315722      0.76166210198292     -1.72983226889118
  H   -2.90289102850970     -0.93488140395548     -1.24502876756755
  H   -2.78968761656206      0.33961411187990     -0.01344254125274

# R
  O   -2.74798638960090      6.04324430875388     -0.63420872208659
  C   -2.89355390221745      4.81901974633301      0.10215116709944
  C   -1.62252535889035      3.99639526768739      0.13096974652831
  O   -0.92276990918894      4.00712154185958     -1.01702312305347
  C   -1.51950305514153      4.64086349737414     -2.14709588242493
  C   -2.11463814640368      5.97235125857108     -1.78664238022204
  O   -1.26178350984853      3.38380783480141      1.08794915733208
  O   -2.05211474525166      6.97523970826271     -2.47333395564192
  Al  -1.12713460349223      7.43860999714447     -4.18104111587374
  C   -2.66355542000183      7.37116996516443     -5.39421402854138
  O   -0.09445196726524      6.03576328361365     -4.31245177302356
  C   1.29499542631298      5.93307240653576     -4.21771681048779
  C   -0.24876780553539      9.12803946407814     -3.68807549808611
  H   -2.30721740258847      4.01178145010976     -2.57822592927445
  H   -3.16365588174064      5.10307855258407      1.11336786057902
  H   -0.75660460936668      4.80332635517041     -2.91101514628083
  H   -3.70308661732438      4.22593000937414     -0.33357710212610
  H   0.24789708252571      9.59019499773968     -4.54710114004864
  H   -0.98001205548021      9.85123121115032     -3.31426575726191
  H   0.51164137153611      9.01520499289626     -2.91021984240687
  H   1.73433321971806      5.67028441689256     -5.18680303583122
  H   1.76337898157231      6.86290929667330     -3.87157860308106
  H   1.58406272751485      5.14398283859213     -3.51157669397112
  H   -2.37690058931781      7.69805871619836     -6.39890538934795
  H   -3.06618408396431      6.35839603323220     -5.49663499662044
  H   -3.48305175655989      8.01943884910690     -5.07176600564660

#c-TS1
 O                     1.11731  -0.50511  -1.54584
 C                     2.52084  -0.36129  -1.30965
 C                     2.89199   0.13236   0.06927
 O                     2.00681   0.9319    0.66997
 C                     0.87699   1.37137  -0.06107
 C                     0.29672   0.34276  -0.98554
 O                     3.92578  -0.15968   0.58472
 O                    -0.88528   0.31264  -1.28802
 Al                   -2.23354  -0.04607   0.14972
 C                    -2.99316   1.72362   0.54682
 O                    -0.92852  -0.54866   1.20669
 C                    -0.88611  -1.53088   2.19307
 C                    -3.35875  -1.47156  -0.58894
 H                     1.13395   2.2526   -0.66409
 H                     2.95704  -1.34551  -1.45224
 H                     0.11693   1.64625   0.66418
 H                     2.93953   0.318    -2.05818
 H                    -4.09486  -1.8229    0.14179
 H                    -3.92454  -1.13011  -1.46125
 H                    -2.77595  -2.34316  -0.90064
 H                    -1.28281  -1.16817   3.15022
 H                    -1.45764  -2.42762   1.91669
 H                     0.14898  -1.84524   2.37124
 H                    -3.71954   1.65488   1.36364
 H                    -2.25382   2.46929   0.85716
 H                    -3.5298    2.14044  -0.31135


# TS1
  O   -1.69693728402536      6.30352900933302     -1.00479836607120
  C   -1.45378896958043      5.22394343499650     -0.09911272500961
  C   -1.08795295842841      3.90648747994392     -0.75138387962536
  O   -1.68929180338734      3.64587225840909     -1.92097215760105
  C   -2.64765570009622      4.58444974385092     -2.38731648486096
  C   -2.22897162474981      6.01235615139131     -2.18371308855958
  O   -0.33035541443575      3.12862441691682     -0.25483578857593
  O   -2.77754332798234      6.93801373342082     -2.83321135385531
  Al  -1.43760437904596      7.46234614329445     -4.09101093326272
  C   -2.06210118028118      7.26979743744810     -5.93148139897971
  O   -0.64649652167729      5.96791710891601     -3.39628918527391
  C   0.67765264990166      5.75493916408640     -2.99083529629714
  C   -0.58651791713173      9.13735543325859     -3.54171225608322
  H   -3.60407990815848      4.43942598423379     -1.86933825147111
  H   -0.63617864036570      5.53010594559939      0.54533817154171
  H   -2.78690510089287      4.40197449021924     -3.44672916050248
  H   -2.34596509464153      5.07396595266047      0.51763234854821
  H   0.48497139989435      9.14401041035806     -3.77075191594388
  H   -1.01922040370606      9.99295478151319     -4.06725628128348
  H   -0.69314071036369      9.32551528656018     -2.46956017849931
  H   1.37127790389732      6.33110180940827     -3.61001168427587
  H   0.83110734329562      6.07387636668479     -1.95183084348956
  H   0.93679983169077      4.69670194253403     -3.07887650494966
  H   -1.24709266568310      7.50860316239178     -6.62373755133868
  H   -2.42508067538153      6.26989820687577     -6.18257602430516
  H   -2.86811784866501      7.97475014559488     -6.15466420977482

#I1
  O   -1.24928321598878      6.17553998659718     -1.07508362039854
  C   -1.54332632128861      5.21673262429997     -0.07384218711127
  C   -1.25228836662546      3.79763836938006     -0.51460432316912
  O   -1.56583490763234      3.54522492299167     -1.80114707395971
  C   -2.36601420941200      4.53681728509559     -2.44351259482536
  C   -1.78582057543438      5.93622371941051     -2.33599779986981
  O   -0.77270259292749      2.95397327010714      0.18230162569837
  O   -2.62382595754712      6.86986599723621     -2.77535968338243
  Al  -1.59859536246427      7.64490035518813     -4.05860065401911
  C   -2.17658036832690      7.33450955235956     -5.89788236801016
  O   -0.65555704448808      6.09089575753600     -3.31180474801780
  C   0.67602672040304      5.68079262444275     -3.01699170484238
  C   -0.62115580788148      9.27381697121331     -3.61364265120764
  H   -3.37018623454897      4.55311779921973     -2.01472825501041
  H   -0.91328992984030      5.44388424862628      0.78124635717578
  H   -2.43632259761172      4.25456944931771     -3.48933162055324
  H   -2.59094040208833      5.28964669330589      0.24446213932714
  H   0.30512001645290      9.34879920841140     -4.19215225992979
  H   -1.20978302674889     10.16137771258618     -3.86569875908662
  H   -0.35529081573353      9.34437618108291     -2.55595550539833
  H   1.32512108083389      6.20778991045414     -3.71228094853696
  H   0.93605933668055      5.95958894647563     -1.99710290105261
  H   0.77584660205501      4.60507826773936     -3.16114711485316
  H   -1.39156737795021      7.61126396964378     -6.60820089421229
  H   -2.46773355469873      6.30110910183968     -6.10341692937021
  H   -3.04126408718785      7.96098307533900     -6.13856052518412


#c-TS2
  O   -1.09386200000000      6.11779400000000     -1.38918500000000
  C   -1.91720000000000      5.58695700000000     -0.40216100000000
  C   -1.55251600000000      4.16125300000000     -0.15359700000000
  O   -1.24671200000000      3.48475600000000     -1.25805500000000
  C   -1.65670100000000      4.06394200000000     -2.47371600000000
  C   -1.26218700000000      5.52324300000000     -2.63590600000000
  O   -1.47723300000000      3.65734500000000      0.90969200000000
  O   -2.19906100000000      6.13950400000000     -3.36373000000000
  Al  -1.81315800000000      7.58795300000000     -4.20830500000000
  C   -3.02670000000000      7.96507300000000     -5.64344600000000
  O   -0.07340100000000      5.70231400000000     -3.32390100000000
  C   1.08747400000000      5.18128200000000     -2.74494900000000
  C   -0.46639400000000      8.82548700000000     -3.63648000000000
  H   -2.72583600000000      3.99278900000000     -2.57066500000000
  H   -1.74559900000000      6.14213200000000      0.49839700000000
  H   -1.20415500000000      3.48044200000000     -3.25012700000000
  H   -2.96390700000000      5.67494200000000     -0.66639100000000
  H   0.43909800000000      8.66820000000000     -4.20225200000000
  H   -0.77351900000000      9.84537500000000     -3.80313000000000
  H   -0.21428000000000      8.70086200000000     -2.59732400000000
  H   1.90854000000000      5.57352300000000     -3.31225000000000
  H   1.17972000000000      5.49150900000000     -1.71886500000000
  H   1.10119400000000      4.10397400000000     -2.80298400000000
  H   -2.51249600000000      8.41318500000000     -6.47915100000000
  H   -3.56370600000000      7.10255100000000     -5.99830400000000
  H   -3.75796300000000      8.68807500000000     -5.31312900000000


#TS2 
  O   -1.33286700000000      6.21657900000000     -1.88831700000000
  C   -2.19279600000000      5.72852500000000     -0.90590200000000
  C   -1.70404900000000      4.43208200000000     -0.34874900000000
  O   -1.23702000000000      3.59215800000000     -1.26559900000000
  C   -1.50339900000000      3.93408800000000     -2.60611500000000
  C   -1.06964400000000      5.33666200000000     -2.96588700000000
  O   -1.69727600000000      4.15341000000000      0.79772100000000
  O   -1.74775700000000      5.74971900000000     -4.04050100000000
  Al  -1.73795300000000      7.45769700000000     -4.31458600000000
  C   -3.39429800000000      8.20584100000000     -4.93747100000000
  O   0.26892600000000      5.43648000000000     -3.25119000000000
  C   1.17755500000000      5.24854500000000     -2.20574300000000
  C   -0.13171700000000      8.47850500000000     -4.08725500000000
  H   -2.55454400000000      3.83073300000000     -2.81356800000000
  H   -2.21429000000000      6.44816600000000     -0.11195500000000
  H   -0.95924500000000      3.23656400000000     -3.21012400000000
  H   -3.19966400000000      5.60351300000000     -1.28591500000000
  H   0.67616800000000      8.04173000000000     -4.65144700000000
  H   -0.24456100000000      9.50436600000000     -4.39566100000000
  H   0.17870200000000      8.46767600000000     -3.05489100000000
  H   2.14317600000000      5.46678400000000     -2.61964900000000
  H   0.97841700000000      5.92339700000000     -1.39206200000000
  H   1.16688100000000      4.23638400000000     -1.83401800000000
  H   -3.22800100000000      8.94017400000000     -5.70879400000000
  H   -4.08837200000000      7.47493400000000     -5.31443700000000
  H   -3.88293300000000      8.72975500000000     -4.12780400000000

#I2
  O   -1.18497328342925      6.49035262902399     -2.39272027488167
  C   -2.17972391390061      6.22136145030395     -1.41443619706004
  C   -1.99021660403727      4.88887806057317     -0.72276816581425
  O   -1.53249719216198      3.88268774271415     -1.48824181810474
  C   -1.52646054597587      4.09905256528110     -2.89929320526668
  C   -0.72928906771644      5.31726053258380     -3.34545896264667
  O   -2.23448336034860      4.72058674386160      0.43469577970393
  O   -1.07502540083754      5.75799859625355     -4.54065899038421
  Al  -1.55455874881775      7.44929698867373     -4.08424273521785
  C   -3.47465997670233      7.82524645219257     -4.14913102864926
  O   0.62526045196269      5.24512227612209     -3.22629059090497
  C   1.19834633266824      4.96495056011373     -1.95751522916389
  C   -0.18085365923761      8.81253226391935     -4.27815827976224
  H   -2.54715322879250      4.20944472349585     -3.26844378438400
  H   -2.11528222888770      6.99680430133878     -0.65444572379993
  H   -1.08637407841641      3.21067127899947     -3.34613199941821
  H   -3.18253249481566      6.25320420215813     -1.85515836879838
  H   0.79379683687474      8.39581806094467     -4.01060925356216
  H   -0.10215808047777      9.20348880965516     -5.29648030274537
  H   -0.36871131338215      9.66865335877585     -3.62362281030792
  H   2.26692030098871      5.12354363798088     -2.08063902434394
  H   0.82085250064085      5.65590832596494     -1.20267683350126
  H   1.01447962318220      3.93752566844970     -1.63909071005959
  H   -3.74531302842145      8.32242836769560     -5.08528501485717
  H   -4.10414880169959      6.93502438961732     -4.07260204315031
  H   -3.77443003825897      8.51067601330688     -3.34963043291919

#TS3
  O   -1.15005167240263      6.60375422003735     -2.34260046593499
  C   -2.10579592222350      6.33343967457805     -1.34454923089404
  C   -1.97844198972995      4.94739865468311     -0.74593972906531
  O   -1.57736972094697      3.95448903321144     -1.56974871474754
  C   -1.56842079204022      4.20404073888374     -2.96743087483839
  C   -0.62085626792427      5.29515867006657     -3.42424237415608
  O   -2.21133133429344      4.71088635446542      0.40181710356109
  O   -0.90352075563579      5.83097293626391     -4.56300354266145
  Al  -1.52047934314924      7.47381909748055     -3.99189880540563
  C   -3.46234614806330      7.65657006845746     -4.16433695234097
  O   0.68666885137527      5.19979311801850     -3.18927783226107
  C   1.17706800978822      4.82281987912771     -1.90494784928164
  C   -0.23825693554767      8.90296936920979     -4.29320340506842
  H   -2.56435980973858      4.47525656458480     -3.32015026149018
  H   -1.97548014857380      7.03671785450354     -0.52155850558603
  H   -1.27649225561656      3.26810006113886     -3.44368817373797
  H   -3.12929252148137      6.44877626478998     -1.72382124506667
  H   0.77293876892278      8.54360062804368     -4.08402982267434
  H   -0.25089325300091      9.27116774664590     -5.32310601096303
  H   -0.42410639413562      9.76460044648912     -3.64556026618808
  H   2.25474498439346      4.94849097257852     -1.96477660261601
  H   0.77695297931740      5.49309951681543     -1.14556942212849
  H   0.93311790640695      3.78991983115847     -1.65975723708520
  H   -3.73852760525218      8.08495461710913     -5.13223014440000
  H   -3.99851475002446      6.70692234268695     -4.07765876001349
  H   -3.87614488042359      8.33080033897200     -3.40776987495609

#P
  O   -1.36337805988112      6.85896222898676     -2.09437066847713
  C   -2.31739372629133      6.38329620485017     -1.21171286076484
  C   -1.91605238569058      5.04750443155638     -0.61220065102084
  O   -1.43785980315072      4.08286748609634     -1.46238146669969
  C   -1.50944314238103      4.24758105842767     -2.85834754894644
  C   -0.45432365129498      5.13004166073778     -3.49440806759267
  O   -1.96613703706669      4.78102523550314      0.55069682667650
  O   -0.76818759948723      5.82900987315775     -4.46853666582820
  Al  -1.59677073953165      7.48294414811417     -3.75396091174817
  C   -3.48173720431410      7.49179042006654     -4.30593192908123
  O   0.80124689068141      5.07832956491847     -3.16765640067923
  C   1.29471735396129      4.40772638372338     -1.99415269485510
  C   -0.29239122732910      8.85625347505908     -4.21129560997727
  H   -2.47445835147563      4.63751380467859     -3.18059399047857
  H   -2.45323338969782      7.05145888267178     -0.35709711554980
  H   -1.39736385694797      3.24718513732844     -3.28925391267183
  H   -3.30970697561914      6.25814783535674     -1.67687239326274
  H   0.71699334094288      8.50588657923972     -3.97732402564729
  H   -0.31141951777104      9.11851438686659     -5.27281855233303
  H   -0.45557488656741      9.77844424711840     -3.64649083405516
  H   2.36654793545824      4.33448919780627     -2.14953501958931
  H   1.07506227474058      5.02075760162999     -1.12394773298412
  H   0.85688072436221      3.41994417640397     -1.87707163379695
  H   -3.59541049694759      7.83622597279798     -5.33822919447987
  H   -3.96732768391458      6.51314675596213     -4.24490305995576
  H   -4.07225478478691      8.17431925094174     -3.68710788620124

## Propagation: Glycolide + Al(CH3)2OCH3(glycolide)

#R
  O   9.94740756727407      1.81068925502249      0.88854900508845
  O   9.11800603557466     -0.81662586268596      0.84413326627261
  O   12.03481895516118      1.16817596923016      1.01046673100911
  O   7.02903974056480     -0.14874023268086      0.53238736511167
  C   8.59061081726978      1.50838812127180      1.22628589012685
  C   10.36636511124772     -0.49726418195370      1.45562805666743
  C   10.86664979079664      0.87967337988648      1.11002862860169
  C   8.15285265390669      0.11502224376383      0.83577805845384
  H   7.97559900843541      2.22426099667623      0.69034456356221
  H   8.43853520333388      1.65466517245299      2.30009585678820
  H   11.08792560625989     -1.22510808489033      1.09777346703018
  H   10.30296451191887     -0.58895801859487      2.54305076859686
  Al  13.80064591539300      0.04258252645728      1.70440151776075
  O   12.78536568303584     -0.40881442670613      3.10996720367019
  C   15.74863084634734     -0.89804018911391      3.83245424031746
  O   15.48239787736697     -0.94584896055969      2.64642511246692
  O   16.75735918051365     -1.62433729306096      4.27385549552888
  C   17.10456938122917     -1.63471373030216      5.66696710991354
  H   16.22758700991356     -1.80641317343395      6.28663336657353
  H   17.80653083078125     -2.45426254695285      5.78242220403460
  H   17.59356295696838     -0.69926291019259      5.94018279700561
  C   12.76045758928383     -1.64244687760195      3.72123906258593
  H   11.75709769001823     -2.08589482772070      3.71094386942142
  H   13.41254192652733     -2.38587013331569      3.23268664087074
  C   13.14885412349830     -1.67640658744285      5.19575667445196
  O   12.62651715127684     -2.41048869732369      5.98233131129810
  O   14.16007656583988     -0.88542427803173      5.66574575384825
  C   14.95302869219158     -0.06082429747681      4.81896082301706
  H   15.62950997290734      0.46805757849921      5.48907365186680
  H   14.34997504405409      0.65374652764943      4.27224236298383
  C   13.72403423135725     -1.27803167997796      0.24425772063034
  H   13.38317000644894     -2.25611889396891      0.60424508470382
  H   14.70842664534978     -1.44777141405629     -0.19987657103257
  H   13.05581581500582     -0.98510794042261     -0.57016877547856
  C   14.74874207997779      1.76999482327700      1.74288556265842
  H   14.13373446976316      2.56881065389985      2.16599217473624
  H   14.98263705524729      2.07829514965469      0.71813221302072
  H   15.69830525795989      1.75864484072572      2.28355773583691

#TS1
  O   11.03753298214193      1.07219150381151      2.51478433176191
  O   9.38759822528841     -0.23225923733373      0.78393437265106
  O   12.40485784953872      0.86985624475436      0.76247811832101
  O   7.65885055817031      0.70896003839861      1.81090925093916
  C   9.75633951889141      0.66747650991398      2.98107114945412
  C   10.67275669507956     -0.79453744476029      1.03726491173709
  C   11.62996274972871      0.25872890256665      1.59123646414201
  C   8.81107320861373      0.39624913825970      1.82971357213283
  H   9.36323994860163      1.48927542596660      3.57088838983508
  H   9.82071872860833     -0.21533183793014      3.62766698752671
  H   11.05929033191858     -1.14615822442965      0.08624228282538
  H   10.56067825450800     -1.64471912266947      1.71246245786413
  Al  14.08701864742101      0.10784888030605      1.04118647295617
  O   12.79857850512653     -0.58764499216864      2.36804250384144
  C   15.50374630361860     -0.82071411964764      3.84396832167570
  O   15.50476795244927     -1.05444204074054      2.65631040018442
  O   16.28678916699959     -1.53623275629745      4.63952972130182
  C   16.38625327035207     -1.24876436830697      6.04117575534430
  H   15.41062401560489     -1.28414978961898      6.52050670184852
  H   17.02812246725220     -2.02349470403259      6.44699837787332
  H   16.85609775840511     -0.27756923798226      6.20165267393206
  C   12.63549861600857     -1.57677046035893      3.34563034457370
  H   11.70609641262344     -2.12536690245592      3.20067931085121
  H   13.45244402876934     -2.29718494556125      3.25107165416650
  C   12.58401522767740     -1.08989291200586      4.78754903815299
  O   11.71490264756273     -1.44064765441008      5.53178637908974
  O   13.57890677302661     -0.31611269925640      5.28152048366537
  C   14.60303576156300      0.24130276650449      4.46081414114671
  H   15.17755628679123      0.88195867407769      5.12855071842156
  H   14.18507043965142      0.85148876347938      3.66826446626225
  C   14.40953691636932     -1.28354032371423     -0.28942172101462
  H   13.77752566245373     -2.16135398822375     -0.12091378786020
  H   15.44416418715805     -1.63445604806219     -0.29254633187867
  H   14.18116954244286     -0.91365319155543     -1.29342759859139
  C   15.21416221206568      1.68214199063472      1.37144098573933
  H   14.81012701537868      2.36060231832579      2.12890835910100
  H   15.23435809922276      2.26782477977056      0.44554729484990
  H   16.25053803291653      1.45860206475231      1.63378604517635

#I1
  O   11.16999432301966      0.06722173547839      3.28942185860583
  O   10.11534740653395     -0.51061674701950      0.77502904394228
  O   12.76821839336752      0.43158178100916      1.73612342572208
  O   8.69931473544607      1.16643587345101      0.95876702624647
  C   10.29853229974198      1.01121102560037      2.69994965902018
  C   11.15829884966350     -1.29731297706724      1.34769735722029
  C   12.02151001073322     -0.50279331316337      2.31652312151923
  C   9.62441631294507      0.56128245175578      1.41845643936173
  H   10.83205794995293      1.93655595353766      2.46328327807001
  H   9.52008936942008      1.23603261445663      3.42561427702971
  H   11.76941341446875     -1.65862898383698      0.52316598244185
  H   10.70565033504769     -2.14642405674632      1.86398137591648
  Al  14.37619596767603      0.45172775870088      0.98771273526923
  O   12.86363390350924     -1.42527317235299      3.01063986653932
  C   15.15022258983156     -0.46420060384671      3.68046893575817
  O   15.41806910233415     -0.15347698530886      2.52276951060125
  O   15.77972591949985     -1.49387594536127      4.18034055552936
  C   15.80264723905048     -1.81652948115840      5.58318547494459
  H   14.94688759265564     -2.43580324571266      5.84025169632169
  H   16.71939203970653     -2.38084437917498      5.72524342541238
  H   15.81053657682160     -0.92167269586998      6.19799149063290
  C   12.37852465845608     -1.98499787489119      4.19835234291530
  H   11.31959429418155     -2.23688042624027      4.14933410167058
  H   12.93223823619899     -2.91576154384809      4.35061963250674
  C   12.56135176556508     -1.17402877847718      5.46928979922895
  O   11.95091821045881     -1.45017739302752      6.45806212523484
  O   13.52058164150108     -0.21449103865815      5.56716613317325
  C   14.21303061922981      0.39412502244583      4.49745120334951
  H   14.83305193676960      1.16554879698787      4.96551293833036
  H   13.53772023997201      0.88361164582536      3.79908699313351
  C   14.62769604578826     -1.01191222134347     -0.28161794129725
  H   14.48326710475113     -1.98447186693572      0.19903432678394
  H   15.62412341731567     -1.01853065800815     -0.73129253019412
  H   13.90953023011373     -0.94196089626648     -1.10471307152500
  C   14.83344528400895      2.31641834131828      0.62222141518015
  H   14.63582875053834      2.96398230042805      1.48185151279111
  H   14.20330444474982      2.68734052352107     -0.19249825882392
  H   15.86964578897563      2.47709945979912      0.31279074143700

#TS2
  O   12.25678574694207      0.24907230222856      2.15276902743516
  O   10.29134766384202     -0.97602579278244      0.63384552890332
  O   13.03337621592524     -1.76705554348562      1.28978868023489
  O   9.74564979592278      1.01585544552367     -0.16008599695687
  C   11.13793911799725      1.00763084324438      1.77611213169370
  C   10.67830257134597     -1.68514144896356      1.80114676435969
  C   12.15149453045968     -1.50672092402253      2.12260868371655
  C   10.32826444181711      0.37337171035219      0.66094637404865
  H   11.45663005897561      1.98947996535459      1.42597934122952
  H   10.46831003244637      1.16359803473964      2.63244015375102
  H   10.50501045878188     -2.73816096327884      1.58221510535838
  H   10.04174321677008     -1.39644798431998      2.64033343128568
  Al  13.94072299845792      0.20751504475510      1.16632855935968
  O   12.49408238841104     -1.82648706758091      3.44256096905442
  C   15.17740961571926     -0.75452103564186      3.66036385632803
  O   15.15403277893279     -0.61352522534005      2.44508046768889
  O   16.05480421537216     -1.58690945735391      4.14821980252690
  C   16.31063279031223     -1.73433440985474      5.55692220749259
  H   15.54852326011575     -2.36036231285751      6.01004308387815
  H   17.28145626844869     -2.21673539421824      5.61615335376128
  H   16.34500149608702     -0.76783824890330      6.05377533737092
  C   11.74803052524305     -1.27904665448962      4.50656645118078
  H   11.41294566502730     -0.26391387396647      4.27012014810398
  H   10.88342156313601     -1.89251543121109      4.75986145204471
  C   12.61088390821556     -1.23696424107923      5.75408050896061
  O   12.27558850581084     -1.72629442757952      6.78971983839066
  O   13.80965327450377     -0.60153728797404      5.70474733205582
  C   14.28343268958292      0.07766633983331      4.55866403644762
  H   14.88723727944075      0.91240958845622      4.92618217166926
  H   13.48632890332268      0.48911033104100      3.94535658520815
  C   14.32754266525651     -0.11314328167750     -0.72198916467543
  H   14.62628405399589     -1.14156778090484     -0.93379559316524
  H   15.11140119731314      0.55908743229634     -1.08029399909648
  H   13.43987692759656      0.09401031665610     -1.32997197523940
  C   14.35432773653027      2.10786210473522      1.58964102678019
  H   14.15557913304305      2.44764068928915      2.61260467356452
  H   13.76864588077745      2.76262026345651      0.93328354191522
  H   15.40130342812105      2.33782937552382      1.36494710333444

#P
  O   12.32939477418667      0.47931776601256      2.03831224634623
  O   10.69907675966246     -1.60660281278383      0.80591500790709
  O   13.13566420564044     -2.56500387730317      1.75551748746274
  O   10.42714373332316     -0.11074179857118     -0.78272412344585
  C   11.16680552807980      0.76916688694154      1.32363410394266
  C   10.87787139973892     -1.87404023666775      2.17259658028618
  C   12.33349740290802     -2.11844421217517      2.50922254313993
  C   10.74268020003080     -0.32513387077701      0.34905178481035
  H   11.24876198542323      1.67286616263878      0.71132103319608
  H   10.32676117234772      0.94558524868578      2.01222742654167
  H   10.34056261860523     -2.80448447647346      2.37884039373283
  H   10.43496593742556     -1.09826211170112      2.79125768375923
  Al  13.90694914488380      0.88704443157184      1.27762995761018
  O   12.70780559907950     -1.92555029472842      3.81781495669454
  C   15.00832983799529     -0.64723083940065      3.52491829679687
  O   14.99156269333596     -0.29625019048869      2.34667867226532
  O   15.72957705610092     -1.68130818905697      3.82482802477408
  C   15.86342934557142     -2.23378212926389      5.14707809874887
  H   14.95032895474380     -2.75785651967820      5.41808052968397
  H   16.68425504114373     -2.93932806711765      5.06695677380938
  H   16.09481328752295     -1.46470611474233      5.87763780521257
  C   11.90020948622182     -1.16506837465023      4.70558674649065
  H   11.61426410131430     -0.21770503670780      4.23888445975497
  H   11.01640510928867     -1.71659007583633      5.02121581529259
  C   12.73050677268642     -0.91188354935835      5.94563629022679
  O   12.38014906546063     -1.21675665348385      7.04429817502117
  O   13.94239436631979     -0.32642756941829      5.77488861388829
  C   14.31669761417714      0.24255608087811      4.53753649094132
  H   15.02985028076204      1.03564471935398      4.77551959252809
  H   13.47618397571289      0.70436523133905      4.02016214275735
  C   14.05120339075884      0.31039035494625     -0.57760324135228
  H   13.86765355434540     -0.75903176463095     -0.70615405416231
  H   15.04230124079149      0.53274743046475     -0.98492257892963
  H   13.33024253297649      0.83710229298033     -1.20927968405604
  C   14.48689347370231      2.69710647656629      1.77983678685185
  H   14.32410446234907      2.95817819343731      2.83041669573524
  H   13.92998536674280      3.43302268958823      1.19060191754848
  H   15.54472552864065      2.86660479961045      1.55384854818856

## DXO + Al(CH3)2OCH3

#DXO monomer
  O   -0.85608794918220      1.13459902814635      0.05321224428249
  C   -1.33543256037534     -0.10616987392314     -0.18188977431148
  C   -0.39218137155429     -1.13753900263967     -0.75490389960327
  C   0.78811725579985     -1.48072162072981      0.15319389388969
  O   1.84633683826278     -0.55311706656530      0.08903291494750
  C   1.53040066208392      0.73042064435661      0.57145474426780
  C   0.49839571516746      1.47757256168397     -0.24392865911382
  O   -2.47807331229508     -0.34249073108893      0.09203187834937
  H   -0.99329887242943     -2.02979358614438     -0.92100333741920
  H   -0.00396145481340     -0.80783571338644     -1.72234681162112
  H   0.43956481509681     -1.60251445486691      1.18815862526093
  H   1.21876583385988     -2.42828930659585     -0.17025674357432
  H   1.19636165297896      0.68649363270559      1.61774482012722
  H   2.46327068714911      1.29571281868556      0.53385043243617
  H   0.70332173123334      1.36185618682842     -1.31191972119355
  H   0.55660032901762      2.53751648353391      0.00266939327559


#R  
  O   -0.56723051070269      0.27196249885574     -0.80907936254454
  Al  -0.43555461962085      1.73699125982176      0.14183670377256
  O   1.45203295544619      0.00973683252898      3.36353822137190
  C   0.77305496986635     -0.00619717551884      2.23263222397332
  C   1.79235928991979     -1.21166512056068      4.04609381472691
  H   2.35582300216032     -0.86768541067637      4.91106432716786
  H   2.45015302547875     -1.81317632349312      3.41598552003794
  C   0.60195232334481     -2.02607527385424      4.50340382636387
  H   -0.15719053080822     -1.35737535652050      4.93354243524561
  H   0.94446508126064     -2.70027738645038      5.29027838349164
  O   0.04695934785774     -2.84511897733732      3.50734027468883
  C   -0.59633475222274     -2.13293906409120      2.47614803320688
  H   -1.39443754382123     -1.49769948837402      2.88143005573267
  H   -1.06090862756869     -2.88437488721433      1.83932647540975
  C   0.35305589492169     -1.30186191861907      1.61485046614275
  H   -0.13566947572805     -1.03946718930439      0.67153731116956
  H   0.99389164468697     -0.93996716833531     -1.42652328499325
  O   0.51862814134260      1.08909628280756      1.74630828736230
  C   0.85960878856499      3.05897939786174     -0.52942224649025
  H   1.20362397942235      3.72305055432882      0.26957503281140
  H   1.75148727592005      2.59347197405975     -0.96138712826801
  H   0.42745172189198      3.69635357222602     -1.30680561571233
  H   0.89270147900296      0.61564341788968     -2.25630699685107
  H   -0.28278701361462     -0.65838981247997     -2.61600051706493
  H   -2.81503596311888      2.68035579434718      0.13468880736298
  C   0.28885432008557     -0.18499255973867     -1.80971222917666
  C   -2.16999907162897      2.25234671813567      0.90866352032846
  H   -2.70384714247196      1.39345474587993      1.32786950886981
  H   -2.08993505505436      3.00204268605405      1.70058930091855
  H   1.24406106518748     -1.89863862222853      1.39989985094557

#TS1
  O   0.21975163563918      0.00286639866243      0.07470554872306
  Al  -0.52435809181489      1.71746236009087      0.31077355345142
  O   1.51750404776477     -0.26777247585084      2.21762337380565
  C   0.25377899855341      0.01923077126832      1.86543867651419
  C   1.86250056099213     -1.61891844664528      2.53733960067161
  H   2.95130537790007     -1.64325040680073      2.50354619876757
  H   1.48147168188021     -2.30664441842200      1.78101343808728
  C   1.38917683001789     -2.01284381374034      3.92254592738337
  H   1.60135891541565     -1.18067840604853      4.60771049717433
  H   1.95706969997274     -2.88228317654285      4.25711746261553
  O   0.03758563470893     -2.39150227243017      3.99373018764184
  C   -0.87599544629737     -1.37725775093116      3.63104005776746
  H   -0.72560554935522     -0.48057811911720      4.24608559650046
  H   -1.86083097841340     -1.78347054013846      3.86059141074017
  C   -0.80927835012001     -1.01692965519279      2.14900195245322
  H   -1.75257060710960     -0.57765867346991      1.83010692078156
  H   2.26811190815714      0.32316040099368     -0.07873929865756
  O   -0.05785879543940      1.26598987774165      2.03312580298873
  C   0.56224373639793      3.12660230775371     -0.49714468524708
  H   0.23807905778091      4.11710707175652     -0.16371224777546
  H   1.62446460156494      3.03902825356439     -0.25271466498501
  H   0.46993409320184      3.12186138969321     -1.58832562572409
  H   1.38366705731817      0.12980804607183     -1.60274740304690
  H   1.69393924266524     -1.28380835788312     -0.57903355677871
  H   -2.68352385567810      1.42732064979508     -1.04911944259906
  C   1.45586691954328     -0.21712051336650     -0.57020940425039
  C   -2.45624869826452      1.64892596074929     -0.00120108398375
  H   -2.96843802762831      0.89304432010709      0.59897240029585
  H   -2.92823789479369      2.60825549282082      0.23318096777237
  H   -0.65295370455992     -1.92061827418902      1.56226383891232

#I1
  O   -0.89610874969103     -0.31130309809675      0.96121738142557
  Al  -2.20398135488145      0.24224628755074     -0.35341679333803
  O   -0.57519093849204      0.66800817422206     -1.02087322652766
  C   0.20568126440873      0.15473700541062     -0.08270815961174
  C   1.05985161401199      1.16247284302784      0.66300021430150
  H   0.40866921133682      2.01308106309262      0.86069290657508
  H   1.39017630104450      0.77084372139606      1.62631767614257
  C   2.27902609228990      1.61219893223101     -0.13469905462475
  H   2.01749685894999      1.71441481580249     -1.19540335606051
  H   2.61002641859887      2.58526578974264      0.22785787958101
  O   3.39438676682495      0.75989553809490      0.03209588788680
  C   3.25878144894518     -0.51409771403920     -0.54539504755909
  H   3.14777520449358     -0.44062034461794     -1.63580941078836
  H   4.19300459687330     -1.03651887092873     -0.32692561199871
  C   2.11516788893438     -1.33982164309392      0.00342794121719
  H   2.25057420978784     -2.37614249204948     -0.30945758969618
  H   2.11684292136576     -1.31101287750637      1.09634367577997
  O   0.84963387887265     -0.97055873260373     -0.53366814788134
  C   -0.75962497141158     -1.55094081770101      1.62951969354186
  H   -0.58224718754020     -2.35863782343517      0.91968320390456
  H   0.05669766565392     -1.49958993274897      2.35265717801105
  H   -1.68927161717475     -1.73770984880108      2.16534612520617
  H   -2.37392599923995     -2.03549658938281     -1.55569968615795
  H   -3.75211448649302     -1.02253611097622     -1.96722536636965
  H   -3.71534646470838     -1.84539421955241     -0.42220690506377
  C   -3.08883891680660     -1.31625921352840     -1.14822397532829
  C   -3.24321823190094      1.73144392501297      0.37491872138290
  H   -2.61135590345740      2.47219542348475      0.87218457217887
  H   -3.81442932818889      2.25705042288055     -0.39653446709816
  H   -3.97181919270613      1.37953238721296      1.11244474136907

#TS2
  C   0.14491453967993      0.18811921770327      0.09087790493593
  Al  0.07624020023290      0.02024787486388      2.02550787268094
  O   1.50295277861002     -0.14123104611524      3.01339437555883
  C   2.63614658005190      0.44336805969469      2.54417527536869
  O   2.24157151472458      1.73944206024450      2.07825559554436
  C   3.02101756127704      2.89013622049241      2.34241138571475
  H   4.06511367517470      2.74392945278447      2.04808134361970
  H   2.59912556143076      3.66289082692072      1.69581897381314
  C   2.95168982520814      3.37181328245475      3.77792857820552
  H   3.30127894373414      4.40689522750604      3.81052542649444
  H   1.90240688137355      3.35041313410280      4.10632731322463
  O   3.76952425569585      2.66472386216903      4.67447593902510
  C   3.41845604822763      1.30375789051276      4.83500277054486
  H   4.01679914716942      0.95588012225876      5.67684349263606
  C   3.72327570923796      0.45814922225804      3.61156943773372
  H   2.36037644184163      1.20248440245838      5.10765454826035
  H   4.67694025835032      0.78277781098997      3.19277559939568
  H   3.83566859835865     -0.58493793290476      3.90814294891974
  C   4.00862425179862      0.22500002059274      0.57673842244757
  O   3.04377261586786     -0.33003641012295      1.43383610649071
  H   3.66980737376261      1.17169777653739      0.14760581211177
  H   4.97115079707758      0.37803008319112      1.07731597833735
  H   4.15069078052196     -0.49219374198894     -0.22926285154799
  C   -1.62611874039259     -0.13966289178274      2.95813620116731
  H   -2.27115286800760     -0.85439789763524      2.43892973530481
  H   -2.15603033357909      0.81850894465424      2.92700121700362
  H   -1.55076854352800     -0.44758234531432      4.00223172097182
  H   0.35407817055530     -0.78584662504058     -0.36226865012692
  H   0.94711533031040      0.85845117360200     -0.21629699659080
  H   -0.79570635456615      0.55446222471282     -0.32742847734569

#I2
  O   -0.14438255390282      0.15538901070157      0.73537521409357
  Al  -1.73396850727255     -0.45557768371001     -0.21749835117204
  O   -0.70332087361089      0.44706177427687     -1.39813369720323
  C   0.22905326083094      0.91894493323421     -0.58501028896020
  C   1.65686307570316      0.59968699833291     -0.99319843218930
  H   1.76473870932755      1.06625486896392     -1.97422642641329
  C   1.98076055155288     -0.88341912073960     -1.08567670374225
  H   1.10547772416213     -1.44220085408977     -1.43526610738537
  O   2.47048764121663     -1.42022906765625      0.12780377966634
  H   0.72625192459915     -2.34354979643159      0.73475517896859
  C   1.49023685153683     -1.65012284986802      1.10666352436707
  H   2.00789256996381     -2.12892485974620      1.94103595434447
  C   0.81112256684977     -0.40116592414713      1.63013314788422
  H   0.25968926590491     -0.64443716620521      2.54138090910743
  H   1.55238399790815      0.36113653235509      1.87744342184325
  O   -0.00029282743530      2.25463499708028     -0.33984374306914
  C   0.71189943796411      2.89464216934149      0.69559446613604
  H   1.79582045598595      2.83580402723854      0.56011045673714
  H   0.43926547843843      2.48303746506366      1.67072306962726
  H   0.41411179479988      3.94058262677314      0.66283231127121
  C   -3.30436143458681      0.44993526945409      0.51282518958674
  H   -3.12844907200271      1.51736280674637      0.66625793940052
  H   -4.16806129585320      0.35144611641225     -0.15161230118614
  H   -3.60373189359575      0.02076312319451      1.47475039907160
  C   -1.79151074558253     -2.39845679526378     -0.45077834145950
  H   -0.91847008236968     -2.81517412738283     -0.95736465248677
  H   -1.90000122557923     -2.91786486863916      0.50718324525398
  H   -2.66562756742100     -2.67871285956363     -1.04696909350223
  H   2.78380613592861     -1.03642926044696     -1.80580741568324
  H   2.38468163663955      1.07055751482124     -0.33231565290673

#TS3
  O   -0.18755752710372      0.12443319393697      0.82610699569608
  Al  -1.71083754008865     -0.46709874752841     -0.14524155964002
  O   -0.74090149362157      0.51413554318119     -1.34268742249650
  C   0.20447329882984      0.99811925386157     -0.58827132495845
  C   1.62993931712836      0.63998762213281     -0.94452101615368
  H   1.79012606580828      1.10149726757522     -1.92309371810522
  C   1.91508074209597     -0.85311050494648     -1.02220016578463
  H   1.02129053206025     -1.39366831293412     -1.35003397851269
  O   2.41365571865713     -1.38037473354288      0.18986866616935
  H   0.70131833541769     -2.38221413891207      0.76059899163466
  C   1.44103375339254     -1.67978193726965      1.16186232790122
  H   1.97616828329125     -2.17474981415303      1.97535495267967
  C   0.72395240795118     -0.47126915754245      1.72772148209041
  H   0.15200471495821     -0.77661760996476      2.60944824651684
  H   1.45218635988443      0.27660913875760      2.05214858699766
  O   -0.02899012630271      2.29114227719594     -0.26399362192785
  C   0.91446009682470      3.00271929380478      0.52001185658756
  H   1.72535328135946      3.39155236810027     -0.10002276702065
  H   1.32804661386355      2.38864144989626      1.32075901318589
  H   0.37242262287028      3.83528756793916      0.96325931566864
  C   -3.35571460897950      0.35754491794671      0.51516476823210
  H   -3.22485852678138      1.40209320229487      0.80857144575778
  H   -4.13147033283025      0.32985585946386     -0.25732201530639
  H   -3.76471520382413     -0.17849927721583      1.37717484712586
  C   -1.75507365434421     -2.39789443777836     -0.49452226295252
  H   -0.85897001344789     -2.80690223466460     -0.96558745829982
  H   -1.93023029501133     -2.96224351623467      0.42769210104617
  H   -2.59449952364447     -2.63573551282975     -1.15585839956898
  H   2.70107918430442     -1.03354534119170     -1.75508132600128
  H   2.34359151728223      1.09106032062158     -0.25614256056119

#P
  O   -0.60074257185922     -0.37502204353978      1.59804742823375
  Al  -1.74664406764509     -0.60185318653650      0.30966835288266
  O   -0.63070739718175      0.17206948269576     -1.15758417500783
  C   0.23873864900914      1.01192398278899     -0.93167200585286
  C   1.60756862752218      0.84034648472108     -1.52394798107956
  H   1.50173405119312      0.74868822859360     -2.60656953240293
  C   2.17143166503827     -0.44819341516333     -0.92877771023178
  H   1.58740342770818     -1.29389116931364     -1.29929549448834
  O   2.07025362819814     -0.34787508202146      0.47015953425233
  H   1.04789241740535     -2.14504552950506      0.44028658003376
  C   1.52073745530375     -1.46903058328990      1.15916670736093
  H   2.32460985237405     -2.01226571900786      1.67050743964645
  C   0.48532864015926     -1.00562109242851      2.16482558732530
  H   0.18842647288254     -1.89301625513709      2.74664063271298
  H   0.98248406309553     -0.32473736323672      2.87131448396846
  O   -0.05751428186986      2.01495925814240     -0.15228890465724
  C   0.95691304572516      2.83684908065496      0.43703543625985
  H   1.43813992594650      3.46207311759664     -0.31535354179163
  H   1.68127614288468      2.21026604091358      0.95239657118971
  H   0.42813610446829      3.46270656071296      1.14915759346678
  C   -3.29377792183766      0.58594624601232      0.50303091486225
  H   -2.99425894061865      1.55464458390619      0.91388601976133
  H   -3.80328185059460      0.77534535242556     -0.44701243781431
  H   -4.04174086507202      0.16822751102581      1.18346880024062
  C   -1.96159367106337     -2.43306146835002     -0.38791424388089
  H   -1.02921642595322     -2.86103413195290     -0.76954952483173
  H   -2.33707029555914     -3.11123098921353      0.38518499278538
  H   -2.68288243019006     -2.46938561586738     -1.21033597793969
  H   3.21181593965993     -0.58485057298196     -1.24369720509723
  H   2.25890661087057      1.68304328745579     -1.30961333990650

## Propagation:  DXO+ Al(CH3)2OCH3(DXO)


#R
  O   -2.71263239861170     -1.85866049612781      1.08670002758941
  Al  -2.63016415726894     -1.24775233924032     -0.56777589498123
  O   -1.50166436077948      0.64744499323595      0.25372418818005
  C   -0.32963442953960      0.93915859594992      0.25811430570109
  C   0.77627293072896      0.03944385691270      0.74404725763310
  H   1.32078971493426     -0.32912720264182     -0.13124091159882
  C   0.26609342807485     -1.12842838277396      1.55503677878313
  H   -0.42035734602259     -1.72868887240258      0.96247490543851
  O   -0.36763058461232     -0.62585284645538      2.71030649560639
  H   -1.24114067535471     -2.44216203695931      3.18308764724098
  C   -1.49159770562767     -1.37330891009696      3.13998260825276
  H   -1.69262707689359     -1.02750893069192      4.15718680257331
  C   -2.74597771246427     -1.18365896102289      2.30156316514751
  H   -3.57878955238233     -1.56445199905299      2.91678266741543
  H   -2.91836868909144     -0.10668338081399      2.17720813585865
  O   0.00420181247656      2.14700529242566     -0.21415512444334
  C   1.36732832132229      2.54366290886917     -0.31580605343849
  H   1.95617810834242      1.80424156568877     -0.85869747345774
  H   1.80360210118123      2.71777578291650      0.66878904432659
  H   1.36598618823162      3.47593189656035     -0.87463056326892
  C   -4.07819175697570     -0.02761794571363     -1.13341027381141
  H   -3.64524454579807      0.82816943409539     -1.65906182295993
  H   -4.80737285312691     -0.48268352030331     -1.81062732731197
  H   -4.63168686733791      0.38814193689544     -0.28423312409271
  C   -1.06713492789041     -1.55838145782557     -1.74376147500864
  H   -0.56392834251995     -0.63693144619225     -2.05188835346812
  H   -0.30880391941449     -2.22072774983317     -1.31488817439561
  H   -1.41120220761490     -2.04778907148920     -2.65987165927606
  H   1.11763608549058     -1.76269686147271      1.83656000638818
  H   1.48438537075682      0.62163061478391      1.33670057218443
  O   -3.41042696019887     -3.07616388157367     -1.17089709513919
  C   -4.35534206839152     -3.67504965154515     -0.69241161899677
  C   -5.46031867501994     -3.01411942674427      0.06904435117948
  C   -5.52424520120833     -3.44337456071566      1.53398382960310
  O   -6.16509796479812     -4.68448337654602      1.73556858053534
  C   -5.47241280816071     -5.78002504568749      1.19697295405124
  C   -5.42089255237448     -5.79964454512241     -0.31484143397091
  O   -4.37755278463214     -4.98847088964807     -0.87522800978194
  H   -5.28354606636295     -1.94335396669717      0.00998781837032
  H   -6.41880286050983     -3.23166515569726     -0.41028988927702
  H   -4.51254668718212     -3.44639585973498      1.95143579393080
  H   -6.11881118750744     -2.71407999036556      2.08087941615470
  H   -4.44802331164814     -5.83388665676329      1.59149401330415
  H   -6.01209206980011     -6.66877515667389      1.52894375856167
  H   -5.17375008869919     -6.80249665130870     -0.65897226751505
  H   -6.38599266571870     -5.51056165240039     -0.73675257781647

#TS1
  O   -3.14885054819826     -1.38048805230191      0.66177559558987
  Al  -3.04787776985138     -1.01282546442366     -1.52230327206501
  O   -1.70204998346499      0.33987008943087     -0.68652502437095
  C   -0.59779314760150      0.38171048190557     -0.17682026872365
  C   0.36821240759853     -0.76879706298940     -0.21625083601463
  H   0.38516495702232     -1.14923055220014     -1.23783624354235
  C   -0.12120803013474     -1.87072441346615      0.71739974379697
  H   -1.00494855690330     -2.35457343530110      0.30590876481047
  O   -0.40289218852290     -1.29302462231004      1.98245733400956
  H   -1.74511132864354     -2.78247663729760      2.51141526069557
  C   -1.62292748363532     -1.69971734953303      2.57626430488164
  H   -1.54622386306495     -1.41588137569382      3.62859288385269
  C   -2.83619430515130     -0.99923202847265      1.99199084635920
  H   -3.70200369416813     -1.17048162750425      2.63688989168825
  H   -2.65107082421919      0.07578317824388      1.95944355867657
  O   -0.28453065861952      1.50819723414442      0.44077525397801
  C   0.91266649655202      1.63104420166659      1.21198767431554
  H   1.78414941647724      1.70312661553454      0.56061587502461
  H   1.00836119178710      0.79778550217339      1.90515209225537
  H   0.80009109300778      2.55838814729469      1.76726695135959
  C   -4.31562646273447      0.38735655771074     -2.04726350627624
  H   -3.83125531943767      1.20973117780135     -2.58133468575805
  H   -5.08984731120645     -0.02353247772569     -2.70195056365581
  H   -4.82980794703464      0.82482579984167     -1.18487829173192
  C   -1.72376358225950     -1.77018288581069     -2.77672533927418
  H   -1.08284933794592     -1.02073331255698     -3.25264343111979
  H   -1.07716531095621     -2.52668407674625     -2.31895833485529
  H   -2.26077345140922     -2.28821978403437     -3.57839402007715
  H   0.66311341243496     -2.62678221178980      0.82032995931506
  H   1.37153977475273     -0.45434834454016      0.05909753530825
  O   -4.02361711124139     -2.47061511988702     -0.98164499515597
  C   -3.97674572972670     -2.53127722170415      0.34144798148055
  C   -5.36009994499294     -2.44812336406506      1.00835891034718
  C   -5.57167760662700     -3.27258667368685      2.26817813040203
  O   -5.78240931728814     -4.64358431293543      2.00220991342871
  C   -4.60762781244865     -5.38051581191532      1.75985298582958
  C   -3.81082492411190     -4.90037485240034      0.56707919574232
  O   -3.22401461311970     -3.63441190824941      0.82814619766701
  H   -5.58063201036229     -1.39628683416288      1.20498684882207
  H   -6.08170245115851     -2.77658199232426      0.26050289119588
  H   -4.73599691364748     -3.15853128032278      2.96968661407533
  H   -6.47851992800078     -2.93006468997899      2.77041951847265
  H   -3.95637613445715     -5.35356619962547      2.64590328159584
  H   -4.92858013832823     -6.41210532739388      1.59714925127882
  H   -2.98894982823722     -5.59515599915524      0.37779994932769
  H   -4.42513718072153     -4.85658868324294     -0.33559438296184

#I1
  O   -3.09244618846122     -1.45710930503543      0.53857552165872
  Al  -3.03618513663475     -1.02545684897825     -1.47804533599643
  O   -1.65061426334254      0.42594862876305     -0.61655305605475
  C   -0.53938742147865      0.47768940524764     -0.12923436166819
  C   0.45566947578228     -0.64348750209802     -0.24430058709379
  H   0.47805421387191     -0.96107192631995     -1.28673899462062
  C   -0.01850673013742     -1.80583376122056      0.62016022510635
  H   -0.88640629189749     -2.28275606381771      0.16934898120609
  O   -0.32955233214088     -1.30448407070879      1.91162258991916
  H   -1.67830277314706     -2.81759274246469      2.35419625417266
  C   -1.56363974318701     -1.73611288614589      2.45335736998183
  H   -1.51881002358665     -1.48257418405211      3.51504049476480
  C   -2.76752619948700     -1.03161506920580      1.85625842377053
  H   -3.63548125800911     -1.17703068562765      2.50208515174648
  H   -2.57309883491451      0.03922188200103      1.79179899998970
  O   -0.24014781983760      1.57865416917844      0.54644492698447
  C   0.96711684814151      1.68652167220401      1.30292456936314
  H   1.82960760846435      1.79168886082449      0.64407107831971
  H   1.08318850324352      0.82974923998415      1.96402647093903
  H   0.85426650156760      2.59164227436360      1.89375313803021
  C   -4.28996210762927      0.39941713704363     -1.96722624735959
  H   -3.79201471763469      1.24500728583802     -2.44961478778953
  H   -5.04926273391087      0.02147401325582     -2.65794897313485
  H   -4.82487780835093      0.79870532544070     -1.09863578716024
  C   -1.65787918668999     -1.71023375112209     -2.71210617472190
  H   -1.03575824943575     -0.92760535201427     -3.15760155193531
  H   -0.99494299716711     -2.45694559469847     -2.26323407824289
  H   -2.16609676723480     -2.22388020768926     -3.53509628208422
  H   0.77833322088727     -2.55169384169516      0.69296292936378
  H   1.45360492211299     -0.32959677508221      0.04954110755416
  O   -4.04467420843121     -2.52926900716240     -1.07225963362761
  C   -3.97728453364991     -2.60005154200429      0.24446331423923
  C   -5.33908148893175     -2.45801037384300      0.93941450778438
  C   -5.53241164145515     -3.19379480083104      2.25632722880624
  O   -5.78647008684183     -4.57176830973779      2.08518844855684
  C   -4.64274030015337     -5.34961984762526      1.82553671441256
  C   -3.89384116677429     -4.95883226959359      0.56935323239983
  O   -3.24230827079630     -3.70780650002772      0.73387253198309
  H   -5.54600636197961     -1.39228324973720      1.06106267391206
  H   -6.07931350945989     -2.83034929479260      0.23112500775763
  H   -4.67303581355721     -3.06008420924382      2.92504552587100
  H   -6.41383553693482     -2.79574380601222      2.76227336168583
  H   -3.94654650004061     -5.29139090985402      2.67512965949279
  H   -4.99545486151682     -6.37984829979553      1.73913698009204
  H   -3.11075300043167     -5.69476940726956      0.37305567281129
  H   -4.55474642880168     -4.93500249863821     -0.30092324118570

#TS2
  O   -2.94539203127232     -0.76252971728477      1.65460842193089
  Al  -3.06176142655551     -1.32032137464534     -1.45139962478566
  O   -1.86579642721107      0.13458827292532     -0.91759709694068
  C   -0.89130933390266      0.26150196531420     -0.19079236314461
  C   0.20447246679090     -0.76435561974813     -0.10378194985503
  H   0.35330339139114     -1.12982252833307     -1.12062119491397
  C   -0.14337412148907     -1.97162788812961      0.75463783380058
  H   -1.06074689490560     -2.42960754571293      0.38738738328083
  O   -0.28119430306970     -1.60124274692636      2.11443894805260
  H   -1.68412868591826     -3.11353511874517      2.24389042317032
  C   -1.36860807173743     -2.21590312759996      2.78077551973016
  H   -1.03022910397715     -2.51291720857518      3.77799853789613
  C   -2.52264687097166     -1.24644556425270      2.91368775086769
  H   -3.33843151659803     -1.68956250774105      3.48566570997973
  H   -2.17779250348879     -0.36446080997174      3.45767439427217
  O   -0.80882478330126      1.39194813394715      0.47300062146730
  C   0.20574901232232      1.60138218889537      1.45857730132352
  H   1.15344822314338      1.84938943987301      0.97873086345652
  H   0.30818245482099      0.72677098469783      2.09695675464077
  H   -0.13824441423111      2.45027616347200      2.04296142982089
  C   -4.32794177977052     -0.84774915300212     -2.88659398619894
  H   -3.79509763503769     -0.54075172376474     -3.79284538096639
  H   -4.93592347246673     -1.71440544444759     -3.17369114734955
  H   -5.01854073202104     -0.05176726446868     -2.60420757975060
  C   -1.67486286318052     -2.44814323609797     -2.37829792465655
  H   -1.08525567267693     -1.83453597137398     -3.07077565867039
  H   -0.96419922110723     -3.00950733726219     -1.76161694355352
  H   -2.17832934070759     -3.18866059931022     -3.01078220179086
  H   0.67063903697478     -2.69763064810795      0.65261640199558
  H   1.13299142690366     -0.31536921704390      0.24378369957456
  O   -4.27547558152435     -0.51743316689635     -0.06299568361595
  C   -4.03344082618181     -1.22197047223232      0.95261865589874
  C   -5.19546856839365     -1.79118816028921      1.74106461392481
  C   -5.11819578422612     -3.18643991287456      2.35002654914464
  O   -5.45703449508060     -4.21743463051720      1.45581243786907
  C   -4.38856923965020     -4.68247684545284      0.66398652994774
  C   -3.97244601027352     -3.72243476881264     -0.41995031036923
  O   -3.24842244186946     -2.60565435519963      0.05796689942148
  H   -5.40075559961255     -1.06491384864775      2.53454470117651
  H   -6.05095714393996     -1.75929091409746      1.06796491609791
  H   -4.13527811634416     -3.39250893461120      2.78649117777246
  H   -5.85159721053713     -3.24220264728851      3.15730555320592
  H   -3.52371078445862     -4.92765472516943      1.29766394441890
  H   -4.74313062231805     -5.60497045898433      0.19837712712445
  H   -3.32789437366596     -4.25330333029238     -1.12882860315683
  H   -4.87216000867300     -3.40561662521365     -0.96647845154410

#P
  O   -2.59607896307819     -0.44873015988864      3.42448461921729
  Al  -2.31579698962691     -2.25222555435906     -2.43868967908321
  O   -2.12929786608305     -0.51759360885008     -1.61118363481053
  C   -1.45261368687237     -0.05706462212771     -0.69144236657066
  C   -0.13796249461405     -0.67009203119132     -0.30850377831599
  H   0.34540718746123     -0.94985391561187     -1.24332917587270
  C   -0.31758074333863     -1.92987998740675      0.53253046500856
  H   -1.10693163280918     -2.55858200083299      0.11109765455355
  O   -0.63841273698566     -1.54444225681402      1.85189464293688
  H   -2.38153821869435     -2.62911281628398      1.83616894357434
  C   -1.54226584820787     -2.40801443920140      2.50149844791238
  H   -1.05949634135029     -3.35400655404748      2.78537278137322
  C   -2.02121510440642     -1.70738590376287      3.74954044770945
  H   -2.70976039325751     -2.34108234777093      4.31082767577042
  H   -1.17390427342111     -1.47218233001094      4.39323744971835
  O   -1.93026746546342      0.99678499083981     -0.09621154422022
  C   -1.28165688610684      1.58833944160268      1.04277807855933
  H   -0.46534160890705      2.22543554503696      0.70214253215396
  H   -0.93687636580100      0.81866061128943      1.72660266802198
  H   -2.05405735075388      2.17546193313464      1.52752015432202
  C   -3.58699724250207     -1.88027260989644     -3.88790601323655
  H   -3.13080669571028     -1.26843673128830     -4.67250102826128
  H   -3.95315163410365     -2.79132921485932     -4.37221620509183
  H   -4.46477473718053     -1.33498734189323     -3.52875463299505
  C   -0.46906177475687     -2.82027301365875     -2.87669613947398
  H   0.11691438010215     -2.00537873213448     -3.31704316426058
  H   0.09422202729816     -3.21078257565778     -2.02410018950134
  H   -0.47696967582091     -3.61851853356882     -3.62552121777830
  H   0.61887996820273     -2.49682073876767      0.51947767254015
  H   0.49905043332899      0.03229770367229      0.22451346726901
  O   -4.15986911665752      0.72473438131652      2.45226526954779
  C   -3.87541306973295     -0.29455123341278      3.01608751904475
  C   -4.92225163764529     -1.32599201501512      3.39758454311126
  C   -4.87156108896578     -2.67026576810978      2.68771238056620
  O   -4.62378864986498     -2.46682473002972      1.32640860256123
  C   -4.63760698751347     -3.67599039666380      0.58869354653846
  C   -4.32289954140091     -3.41111710555657     -0.86312142606393
  O   -2.97678018662504     -3.11959501207335     -1.06105492177784
  H   -4.88053967714400     -1.49795820417927      4.47708820307320
  H   -5.86975350314778     -0.84184950327749      3.17018953884928
  H   -4.10779246723568     -3.33177708636849      3.11789568708831
  H   -5.83512533606107     -3.17782093940310      2.83894197451607
  H   -3.89448997711075     -4.37375348084765      1.00078204027497
  H   -5.62837329152585     -4.14539301436949      0.67176961020065
  H   -4.62205273973650     -4.31314083352423     -1.41912832468879
  H   -4.97774199617346     -2.59912626417659     -1.20774417401022


## e-caprolactone + Al(CH3)2OCH3

# e-caprolactone monomer
  O   -2.10276167702182     -0.32093115642656      1.07832517882048
  C   -0.61751887159220     -1.03880983198509     -0.65501104094044
  C   0.84582005738248     -1.46954509967246     -0.38289341255511
  C   0.56552075528524      1.44795907396973     -0.31250078034669
  C   1.55493098048512     -0.65319875597356      0.69212002244733
  C   1.79506962686194      0.80249596780709      0.30436052070826
  C   -1.18021622512487     -0.06532519310269      0.35673089154315
  O   -0.61401297839290      1.16033156427423      0.43517696774642
  H   -0.71450451901939     -0.59532733824515     -1.64901990893609
  H   -1.28210173643904     -1.89833959133146     -0.62906278690865
  H   0.84201909245392     -2.51388764876283     -0.06798712587963
  H   1.41668686136941     -1.43084515492045     -1.31372799076232
  H   0.65089957239904      2.53351743305008     -0.30075722106911
  H   0.43498941450724      1.13685346728021     -1.35235140574745
  H   0.95778417701877     -0.68794335377721      1.60736671203080
  H   2.50804376027160     -1.12368967249240      0.94136761413596
  H   2.61010433438702      0.87937357741899     -0.42174516692084
  H   2.10384737516847      1.36701171288952      1.18620893263391


#R
  C   0.83044060381535      3.08505555360041     -0.47547553518385
  Al  -0.43781268532946      1.71254547532692      0.14888118930511
  C   -2.20804493849242      2.16480905920946      0.87427240305404
  O   -0.51271405864347      0.26914546570277     -0.83934617711947
  C   0.37748687946353     -0.15796113870140     -1.82172698281818
  O   0.50246594214140      1.06098506150501      1.75005557332084
  C   0.77673194920277     -0.03858939114652      2.22052868166394
  C   0.34031160326448     -1.32765674078954      1.60603612091755
  C   -0.68457961692426     -2.07449256157121      2.46966065673324
  C   -0.05724947766771     -2.87389652261466      3.59883512276592
  C   0.72772742519979     -2.03049302116618      4.59508019515540
  C   1.87439643896284     -1.23820839907996      4.00131724344222
  O   1.47144647688088     -0.02348737185319      3.33967225040122
  H   2.53390529443319     -0.87618707413191      4.78653591718773
  H   2.46917800727138     -1.84224189911845      3.31187077719152
  H   0.06324432065048     -1.33950597476244      5.12201154972816
  H   1.16020406977945     -2.68600353799871      5.35589682149275
  H   -1.41838340691399     -1.36314346281769      2.85825323210011
  H   -1.23380535589679     -2.74785478241427      1.80954125911851
  H   -0.09162128215355     -1.06412903380046      0.63873508431284
  H   1.08267729621023     -0.90978860502522     -1.43175385794345
  H   1.15649306293313      3.73372681208204      0.34353923331890
  H   1.73481211950545      2.65123627075812     -0.91475552888911
  H   0.38900482763097      3.73415836495843     -1.23774581223188
  H   0.98247683339031      0.65824672214550     -2.23829508808750
  H   -0.16364175443264     -0.62533600765836     -2.65271346457454
  H   -2.84410934929201      2.58446658316711      0.08844895900232
  H   -2.72421281140395      1.28121222597410      1.26341363156504
  H   -2.17529373281418      2.90272394089091      1.68053081611509
  H   1.21803867933746     -1.95969978968724      1.43915602683088
  H   -0.83224792056922     -3.42908321222815      4.13214438251810
  H   0.61093856046056     -3.62432700875524      3.16164631960656

#TS1 
  C   0.58437602123930      3.13003414327180     -0.43756229471454
  Al  -0.54980198575995      1.75292939988435      0.36480540381823
  C   -2.46991851246565      1.70761390823462     -0.02004824561149
  O   0.19530445848991      0.01598335298123      0.11664430862652
  C   1.42165599218356     -0.22337538312895     -0.54584921808565
  C   0.21120030191209     -0.02476422541475      1.82054768030810
  O   -0.13092374392449      1.21877669780810      2.05749168986672
  O   1.47982815101081     -0.29104457208339      2.20048148855528
  C   1.86984454087765     -1.63206601347654      2.51063058117744
  C   1.47365872759402     -2.02268097215914      3.92329652403680
  C   0.00999267360401     -2.41548310019477      4.07910350340895
  C   -0.98176510633222     -1.36954194959980      3.58480071772792
  C   -0.84221282077858     -1.07632184623937      2.09147634169336
  H   2.95417790072051     -1.62932638265854      2.40534787121028
  H   1.46873963948504     -2.33030558809126      1.77197676615757
  H   1.72021852249128     -1.18180341385229      4.57728797861280
  H   2.10463557310481     -2.85838489160870      4.23768497107443
  H   -0.87093927420447     -0.43570445520526      4.14227208735436
  H   -1.99483177704951     -1.72896386322314      3.77799419712820
  H   -1.76866421097053     -0.67198154678775      1.68830334005166
  H   2.23813499919381      0.34405571522361     -0.09658900589075
  H   0.23385954515621      4.13571620712336     -0.18747053319963
  H   1.62853958145537      3.06472233657757     -0.11969307712300
  H   0.56783047638803      3.06171249023868     -1.53083650777296
  H   1.31045940708418      0.07967716524080     -1.58759595150079
  H   1.66680523818729     -1.28738477221709     -0.51556889098589
  H   -2.66488876974965      1.46519852325552     -1.07002218985081
  H   -3.00791674706998      0.97161786984792      0.58206162212362
  H   -2.93683553472867      2.67757362175059      0.17764963518270
  H   -0.62569732043606     -1.98900756701895      1.53413966682943
  H   -0.16603333056502     -3.34507662192409      3.52647680836137
  H   -0.19071861614313     -2.64377426655434      5.12891573142976

#I1
  C   -3.09829449450045     -1.30329776462571     -1.12283382951683
  Al  -2.19228356510492      0.24023243563464     -0.31994402632667
  C   -3.22952683470208      1.74043441797605      0.39248442554769
  O   -0.89688797392650     -0.32446002795844      0.97976595993571
  C   -0.77507350877863     -1.60574728637137      1.56243683401850
  C   0.22622717254733      0.18713708255369     -0.10123646961933
  O   0.89603291112422     -0.91376417312099     -0.54089291417954
  C   2.12556227739016     -1.30869476005389      0.06794191752258
  C   3.31982793233731     -0.55372835444987     -0.48145200796939
  C   3.46443291253700      0.88241780626939      0.01321108070552
  C   2.21642907639774      1.74582790687792     -0.12508810117442
  C   1.02529929093809      1.21421160194915      0.67299526008556
  O   -0.57874677630117      0.66826784307890     -1.02795334715888
  H   0.32405224114869      2.01380588193246      0.90518082329301
  H   1.36100810477144      0.79990851978623      1.62597879926925
  H   1.92852222606175      1.84912143028126     -1.17442084675465
  H   2.45147007567243      2.75065814948801      0.23219702227858
  H   3.25383243159457     -0.58192324107333     -1.57253829831018
  H   4.21799833690505     -1.11469120555606     -0.20523143117388
  H   2.21219984649691     -2.36684767278263     -0.17947183231654
  H   2.06892441282285     -1.22528921208735      1.15694110633346
  H   -0.57025828439927     -2.36330052991977      0.80502862509991
  H   0.01859088124208     -1.60616276778726      2.31262006120786
  H   -1.71845232696203     -1.84151681762820      2.05517415122395
  H   -2.39631116608050     -2.03049498599711     -1.53884382904830
  H   -3.75976124051900     -0.99292327944640     -1.93734162199223
  H   -3.73026408775609     -1.82920490462776     -0.39906047552735
  H   -2.60146764017219      2.47953690380650      0.89682202004123
  H   -3.78476491649742      2.26637277145863     -0.39055572890077
  H   -3.97225221759288      1.39668983085395      1.11969465342800
  H   3.75464863521486      0.86688499176231      1.07013484830139
  H   4.29222926809063      1.35648940977705     -0.52008682832325

#TS
  C   -0.04740300000000      0.53063300000000      0.07901100000000
  Al  0.06408200000000      0.15936300000000      1.98331500000000
  C   -1.45263200000000     -0.43328800000000      3.05102600000000
  O   1.47192200000000      0.40165100000000      2.95593000000000
  C   2.70821800000000      0.65125500000000      2.43587900000000
  O   2.90624300000000     -0.35765300000000      1.45923000000000
  C   4.11926700000000     -0.30716000000000      0.74278600000000
  O   2.68395300000000      1.86869800000000      1.71497800000000
  C   3.21782800000000      3.06572400000000      2.24670200000000
  C   2.77757800000000      3.44789600000000      3.65177600000000
  C   3.56012600000000      2.78032200000000      4.77293700000000
  C   3.41822100000000      1.26730400000000      4.83180000000000
  C   3.77312200000000      0.56033400000000      3.53158800000000
  H   4.31531700000000      3.05254400000000      2.19108500000000
  H   2.87127400000000      3.82576600000000      1.54495800000000
  H   2.91075900000000      4.53062400000000      3.73712600000000
  H   1.70756200000000      3.24699500000000      3.75600000000000
  H   4.06930200000000      0.88529400000000      5.62206900000000
  H   2.39787400000000      0.99246400000000      5.10613300000000
  H   4.73047800000000      0.92277200000000      3.14895000000000
  H   3.89165800000000     -0.50764100000000      3.72203700000000
  H   4.31981400000000      0.70118400000000      0.37280700000000
  H   4.96343300000000     -0.64996400000000      1.34992300000000
  H   4.00857200000000     -0.98009800000000     -0.10582600000000
  H   -2.40506000000000     -0.26708600000000      2.54293700000000
  H   -1.48359700000000      0.08528000000000      4.01271800000000
  H   -1.38533200000000     -1.50205400000000      3.27974800000000
  H   -0.32622800000000     -0.37252300000000     -0.47330500000000
  H   0.90134500000000      0.89923500000000     -0.31032500000000
  H   -0.82069600000000      1.27355300000000     -0.13669400000000
  H   4.61905400000000      3.03881500000000      4.65257900000000
  H   3.24827300000000      3.20713300000000      5.73036200000000

#I2
  C   -3.29958320971528      0.46790336594421      0.41463062132259
  Al  -1.69999339043836     -0.45598138225796     -0.22276459118302
  C   -1.73085659947508     -2.40703154508655     -0.37122853032627
  O   -0.09871885596361      0.14919723957386      0.71509972130902
  C   0.86791782450621     -0.39025980949192      1.61369124067134
  C   1.50395352389956     -1.68031986913708      1.13671418924343
  C   2.51469384727259     -1.52434444763686      0.00960524488892
  C   1.99769538393202     -0.81462400774149     -1.23720593184384
  C   1.67493655611712      0.65817705606539     -1.01997500249414
  C   0.24609060405468      0.93219406515459     -0.58670222613042
  O   -0.01073961209376      2.26375241782274     -0.31600242980922
  C   0.69967030346689      2.89449796024411      0.72492402786505
  O   -0.68550580506698      0.45984622335825     -1.40349579043790
  H   1.77287722288238      1.21380917198234     -1.95418884237314
  H   1.11188027384691     -1.31790732082740     -1.63104404947110
  H   0.70826476903009     -2.36700312704753      0.84153733368128
  H   2.00104382947797     -2.13277191858479      2.00058310457761
  H   0.32948392305701     -0.55514738367323      2.54873282332289
  H   1.62716559217722      0.37217825545598      1.80363020286216
  H   1.77988303458439      2.90482304689178      0.55094031443855
  H   0.48628865976393      2.42611758362235      1.68898154988512
  H   0.34459978589946      3.92276862255714      0.75328055758969
  H   -3.19482486907001      1.55125084253733      0.31789467790713
  H   -4.18239621780140      0.17274000638250     -0.16073274259945
  H   -3.52438714216044      0.24364054114550      1.46261342407353
  H   -0.83705784002189     -2.83465336982425     -0.83067559823853
  H   -1.85442539835312     -2.87552855358630      0.61118061655683
  H   -2.58610430067933     -2.73204855247753     -0.97078097859826
  H   2.76208156859636     -0.89285156658645     -2.01242346583046
  H   2.38617156483252      1.09992648801486     -0.32009669340992
  H   3.38651462252933     -0.97698672531687      0.38626339974920
  H   2.87885935091261     -2.51579530747673     -0.27152517719865

#TS3
  C   -3.32735377774306      0.38160309954042      0.43875648014009
  Al  -1.65948643783470     -0.46846651746611     -0.12931155642434
  C   -1.68335111897225     -2.40663374612740     -0.44012359401243
  O   -0.15549378218393      0.12203717290758      0.83318938518796
  C   0.76462358959416     -0.46905445147579      1.72729930644544
  C   1.43727331477950     -1.71945732329008      1.19099324014263
  C   2.44928603247586     -1.49213193326096      0.07619225968373
  C   1.93149067169468     -0.77600958261021     -1.16871686979966
  C   1.64596084597514      0.70620605222856     -0.96298279807802
  C   0.21365887295122      1.03707745598852     -0.62734825452535
  O   -0.04753684903534      2.31261167006915     -0.27180066716555
  C   0.88133378866341      3.01603936338604      0.53778308012622
  O   -0.72552057456217      0.52819678609187     -1.35725599924513
  H   1.83331601991873      1.26169639431962     -1.88710046676849
  H   1.03420911817607     -1.26467729406143     -1.55373230284939
  H   0.66136766331726     -2.41076532233942      0.85665213516392
  H   1.94611926278341     -2.20426315545118      2.03036733219725
  H   0.21264345261607     -0.70904857711563      2.64108666911044
  H   1.51693114169012      0.27857648490955      2.00203583727533
  H   1.69331110021026      3.42816452067398     -0.06531673965475
  H   1.29189399169122      2.38350553806364      1.32536922115429
  H   0.32597334283703      3.83048932010072      0.99748374933335
  H   -3.28016423949618      1.46841579027199      0.33091208065939
  H   -4.17316829274936      0.03198700991933     -0.16103520594175
  H   -3.57545378518524      0.16095400245230      1.48246710242712
  H   -0.77864136403327     -2.80573424887545     -0.90404047951024
  H   -1.83753883534502     -2.95024610979657      0.49856713162719
  H   -2.52189989830656     -2.67901624911526     -1.08803654853086
  H   2.68705422254602     -0.87234724349971     -1.95036185302716
  H   2.32044625481168      1.12071508466489     -0.21327818981689
  H   3.30075737151391     -0.92818692768839      0.47498846966833
  H   2.84949889720136     -2.46372706341459     -0.22579095499267

#P
  C   -2.99426536972468      0.72691806385846      0.79387814912246
  Al  -1.64868264223464     -0.66300245207371      0.45812271263242
  C   -2.10581204368770     -2.36726926285553     -0.42605138034852
  O   -0.52314769706281     -0.71250387634387      1.78532411267103
  C   0.43934432306316     -1.63685669032991      2.17467750005286
  C   1.50319396104347     -1.86451070870840      1.10467458086945
  C   2.20568151977442     -0.55885639598458      0.70967486393685
  C   2.34843201138126     -0.33303243188222     -0.80504360897843
  C   1.79611280187461      1.03014754379690     -1.20244021839106
  C   0.33113444975882      1.10548179369627     -0.87215277860945
  O   -0.24535128477250      2.25231205363867     -0.58716360215570
  C   0.49730539362137      3.47021007979016     -0.49452502668745
  O   -0.36007059491940      0.09575950075429     -0.86841943088413
  H   1.90339211716165      1.22923332106566     -2.27557023316254
  H   1.79760209614378     -1.10098405993585     -1.34724213399223
  H   1.01046454901341     -2.29593967544242      0.22890401346089
  H   2.22170654093587     -2.61025066153213      1.45675773366186
  H   -0.01373545137183     -2.60574807773972      2.42937335257589
  H   0.92780220426466     -1.26704575468547      3.08857363213923
  H   0.99907936473308      3.69936692327682     -1.43421677315506
  H   1.22052055954933      3.41906749988524      0.31861463441475
  H   -0.24136244964933      4.23463712796947     -0.27265282069170
  H   -2.53972219370275      1.57910085232150      1.30794178773852
  H   -3.48409908341692      1.10645467895479     -0.10749559409169
  H   -3.78268899500268      0.34393770185019      1.44967725723588
  H   -1.24061444410107     -2.84415076530039     -0.89669379373694
  H   -2.52240037412085     -3.08671991844908      0.28582660578041
  H   -2.85889077926278     -2.23463783470618     -1.20888587011491
  H   3.38697175797572     -0.40502055516217     -1.13229904246108
  H   2.33441018214798      1.82470280651591     -0.68557777644338
  H   1.61011673040316      0.25648913313154      1.13094168898429
  H   3.18435984018419     -0.48840495937424      1.18832245862750

## Propagation: e-caprolactone + Al(CH3)2OCH3(e-caprolactone)

#R
  C   -4.10038261622718     -0.00266026707401     -1.12111126924020
  Al  -2.69333413696776     -1.27490368442105     -0.56421302585185
  O   -3.46085702782923     -3.06193283066227     -1.13509109269796
  C   -4.43393635867483     -3.65930775637448     -0.70340387669931
  O   -4.50975520175694     -4.94463401235943     -1.00238950597507
  C   -5.55036286842034     -5.77942359043405     -0.46458921535800
  C   -5.44215821818164     -5.97528573724193      1.03417685213281
  C   -6.01367867898350     -4.83531376195941      1.86721730845227
  C   -5.40350179179108     -3.46915137198370      1.59647433494547
  C   -5.49340192480812     -3.01998416146637      0.13238259097471
  O   -2.71689082597747     -1.78216234995275      1.11563309456123
  C   -2.85283332200975     -1.04564897326093      2.29103274719964
  C   -1.69747972723205     -1.26345252935081      3.26691557207383
  C   -0.40762073160634     -0.53316476144261      2.90851897360640
  C   0.25399799114686     -1.02016220285741      1.61246226240335
  C   0.84124061409568      0.09635770727147      0.76897182626183
  C   -0.21070517690060      1.03024004101264      0.22460559978423
  O   0.19569310997869      2.15751474599643     -0.38907567417217
  C   1.57669014424586      2.44752469913228     -0.55232062582007
  O   -1.39709743372040      0.83070342723149      0.29360212111780
  C   -1.09023415165462     -1.51904666924181     -1.69371279352676
  H   1.37825751123854     -0.31782512699992     -0.09122351090176
  H   -0.47530104636204     -1.56191108691901      1.01817139243126
  H   -1.51021747023007     -2.33962594811050      3.34871060411123
  H   -2.02462229856960     -0.92316367100189      4.25552639890758
  H   -3.78127160039462     -1.34298043349413      2.80358273548570
  H   -2.94819647951151      0.02957177786917      2.08744719640267
  H   2.09520809098374      1.64083267825252     -1.07158167384951
  H   2.05865764513893      2.64212650609135      0.40727283786773
  H   1.62392074198306      3.34743979977090     -1.16048749081479
  H   -3.64001293104590      0.86609643752634     -1.59958416299825
  H   -4.80900695730141     -0.42575163124231     -1.84063155151920
  H   -4.68256046530328      0.38446369160212     -0.27820095953482
  H   -0.63751166927956     -0.57271128768599     -2.00191107682243
  H   -0.30872768095189     -2.12514832003538     -1.22650961424535
  H   -1.37862515319552     -2.04320377748174     -2.61027663364653
  H   1.05316339116976     -1.72844678231569      1.84215119904538
  H   1.57604905022603      0.67552287409626      1.33588211045429
  H   -5.34248842787047     -1.94672185584488      0.05479513593403
  H   -6.47883717149220     -3.25407664111947     -0.28176693616560
  H   -4.35500627589728     -3.43313199883109      1.89567072311133
  H   -5.92147178964989     -2.72275936507292      2.19959958422995
  H   -4.39088941387779     -6.14998537815734      1.28054079445067
  H   -5.97671484426587     -6.89659086150113      1.28064049568886
  H   -5.40259933656976     -6.72126161681292     -0.98822035249280
  H   -6.52637662790166     -5.38013804059436     -0.75289221103127
  H   -0.63985256691317      0.53300306485568      2.82700939422417
  H   0.30112194922622     -0.62785724955738      3.73678828501712
  H   -7.09420110501202     -4.78493735281740      1.69111351658045
  H   -5.88327473509600     -5.07460336503016      2.92549256590770

#TS1
  C   -5.64521960489061      0.42442161580538     -1.29732854853990
  Al  -3.97999505457301     -0.61670764172088     -1.22385670346935
  O   -4.21490987237467     -2.43394760811900     -1.43916823041871
  C   -4.22712024549255     -2.88869064305096     -0.23331875367576
  O   -3.18973866680926     -3.68796905968386      0.10329007938308
  C   -3.42078265002217     -5.06703976380060      0.40481498804263
  C   -3.82996901927677     -5.32891024150050      1.84047997321554
  C   -5.28762935989337     -5.00726801888713      2.12396931348253
  C   -5.65527191168744     -3.55828767140904      1.83732803418492
  C   -5.58330669187394     -3.17490479804055      0.36566650590712
  O   -3.73486960507804     -1.30877058839416      0.47264352099007
  C   -3.61903492589634     -0.78208611541604      1.77773146629201
  C   -2.51463512895001     -1.43260783632971      2.59476890046671
  C   -1.09985085780219     -0.96973319541217      2.26005323409407
  C   -0.67369750621198     -1.22174368002347      0.82089473786855
  C   0.73645466874102     -0.74218689344707      0.52685576982722
  C   0.85154280488049      0.76158656726270      0.46468051517891
  O   2.08480495082358      1.28296945658662      0.26544338767750
  C   3.22757909700281      0.44946913424853      0.15388625568879
  O   -0.07631712087966      1.51522548973836      0.56265314191547
  C   -2.37019060329554      0.07199412416674     -2.10277825384275
  H   1.07756043946393     -1.13475135913835     -0.43601260457840
  H   -1.35511014121696     -0.71975529713694      0.14097130165451
  H   -2.59407012471998     -2.51611094292232      2.47984372463045
  H   -2.71113492826930     -1.20804146189046      3.64782113437767
  H   -4.58004318458681     -0.87396504390302      2.29405222022988
  H   -3.41864042354994      0.29048855404899      1.67608264075279
  H   3.13513236858521     -0.26338331639341     -0.66724672612532
  H   3.42221002496506     -0.09232142761063      1.08188236814152
  H   4.06040261380882      1.11796141483013     -0.05094493818492
  H   -5.55237245697871      1.33803930657835     -0.70032205103193
  H   -5.89148828639391      0.74551464503864     -2.31387712348129
  H   -6.51269722223525     -0.11841276856729     -0.91080675105409
  H   -1.88117361690329      0.85230088482551     -1.51228842492502
  H   -1.63423364364287     -0.71924747430327     -2.27088612052406
  H   -2.60172884084787      0.51520759761317     -3.07598767562904
  H   -0.74567288578552     -2.28765152595304      0.59145080162744
  H   1.44466650804757     -1.12405408736291      1.26865974942863
  H   -6.18106014123476     -2.28836122491247      0.16206244608057
  H   -6.01521037422767     -3.97100284923626     -0.25253209140508
  H   -5.01322473606960     -2.90030890769613      2.42251941745196
  H   -6.67479276554724     -3.37288381696548      2.18280439858745
  H   -3.17729311253481     -4.74672115139637      2.49581361461203
  H   -3.63135529558163     -6.38174720274650      2.06352757003233
  H   -2.46385142074071     -5.53921261149268      0.18639412669978
  H   -4.15459623307469     -5.48044020572397     -0.29346016231874
  H   -1.01669375373593      0.09893468662503      2.47424596747588
  H   -0.40078645391262     -1.47647959747988      2.93459538597955
  H   -5.91857309274233     -5.66071232680262      1.51099373916805
  H   -5.52000351677853     -5.24536312249899      3.16513072805880

#I1
  C   -4.03725080738704      0.32243442416587     -2.85061114327732
  Al  -3.11437876030894     -0.89341143082126     -1.62312569172205
  O   -4.20353533507148     -1.43550518299619     -0.35249574194400
  C   -3.98687404654253     -1.96409323608676      0.86356609938369
  O   -3.20253548816860     -3.15759874803906      0.79648227093116
  C   -3.76054747254353     -4.21151273136968      0.02786149657245
  C   -4.41425282642126     -5.25829707644344      0.90737543591382
  C   -5.67015866270997     -4.76871333034829      1.61630117558937
  C   -5.48176022574035     -3.48256850723872      2.42063474015649
  C   -5.33599932000153     -2.21563500443186      1.57696458693573
  O   -1.86934888094390      0.31886839407854     -0.76176005291299
  C   -0.75036925093325      0.38135931658925     -0.27094671598602
  O   -0.41671548213393      1.55665543451581      0.22807153553382
  C   0.88826102916300      1.80660450382528      0.75640172438424
  C   -1.99884788059727     -2.32267931729934     -2.40212868215591
  C   0.18387980110478     -0.78531235464798     -0.20338528120951
  C   -0.30601819678454     -1.80099956799012      0.83583981276119
  C   -0.36036891099417     -1.28215605983019      2.27462162448041
  C   -1.46852038555701     -1.93993491164281      3.09498369203388
  C   -2.82258671965287     -1.26705070623592      2.90259306502958
  O   -3.17143318710036     -1.03783453687548      1.55654038305249
  H   0.16425684914287     -1.25598713199000     -1.18709815466247
  H   -1.29212567835726     -2.14630964457830      0.53922332474045
  H   -1.53399677305289     -3.00002167670877      2.84241528942560
  H   -1.23082942633847     -1.86840942495145      4.16062009784249
  H   -3.60034458557307     -1.82587699274804      3.42545585669783
  H   -2.78326560287630     -0.27240964379219      3.35832446891795
  H   1.62467463710449      1.81424483717063     -0.04694170244527
  H   1.15862167234248      1.07448485999238      1.51431260148646
  H   0.83309898212747      2.79272834118683      1.20883773677618
  H   -3.34516202981376      0.82784521061943     -3.53196085296554
  H   -4.76147124920976     -0.21212410051158     -3.47380527847817
  H   -4.58853238557347      1.09698140462624     -2.31002560060511
  H   -1.25140174135744     -1.94459223295501     -3.10816630522335
  H   -1.48083680978030     -2.94402522812340     -1.66697490613510
  H   -2.64223847774742     -2.99761660715611     -2.97749475038816
  H   0.35200090499180     -2.67045787069347      0.77890171944371
  H   1.20283495126871     -0.46528522318554      0.00459676924377
  H   -5.54384208640977     -1.33300678259807      2.18492085061784
  H   -6.09292947985907     -2.21921438834067      0.79119879838200
  H   -4.62564916051992     -3.60433143256030      3.08892822090348
  H   -6.35502033408576     -3.35201955224590      3.06604801025976
  H   -3.67758805487786     -5.59251892645045      1.64445830865369
  H   -4.65473464763797     -6.12949869876088      0.28955130762114
  H   -2.93827347355938     -4.65423133923368     -0.53863820980635
  H   -4.46713768604975     -3.80292353506728     -0.69967498299429
  H   0.60777646380448     -1.44104920687425      2.75750022316093
  H   -0.53444981785025     -0.20053583904595      2.28788384178419
  H   -6.46362809835724     -4.60989663419920      0.87793760250877
  H   -6.03052285257047     -5.55696291170268      2.28336438168709

#TS2
  C   -2.83564858279188      1.17059118920919     -0.84855722543364
  Al  -3.28187605627609     -0.67555674551668     -1.31340307895101
  O   -4.83579143753471     -1.24465803640259     -0.61898189320531
  C   -4.56870657750847     -1.79401111201404      0.57508771447095
  O   -3.24510027153545     -2.40449591800096      0.44839508131129
  C   -3.16294028120339     -3.63468543594493     -0.27039287809730
  C   -3.25773183040119     -4.84873905231609      0.63335002496475
  C   -4.65367608916754     -5.11639002451315      1.17788607836665
  C   -5.26433875451373     -3.93737134529609      1.92913102327878
  C   -5.65867736169955     -2.76945269317143      1.02718553389372
  O   -4.37024051054920     -0.73002457071392      1.47672545711684
  C   -4.12323821536744     -0.93871964632703      2.85012022549391
  C   -2.73603621986992     -1.48155378009314      3.17919026568349
  C   -1.60769108179385     -0.78325798198017      2.42381456445252
  C   -0.50060367532475     -1.74010594471777      2.00789342472943
  C   0.53779904957411     -1.06096494369800      1.13349365075529
  C   0.03472332263013     -0.76391641185930     -0.25991245889473
  O   0.72557013741616      0.09889608717370     -1.01446832332503
  C   1.85154150572383      0.79646854296750     -0.48851747958234
  O   -0.93612168229551     -1.29259673578784     -0.74816415909497
  C   -3.07083874826880     -1.33068200851002     -3.14197400897795
  H   1.43084718631909     -1.68619330578442      1.01761710874642
  H   -0.94884518755630     -2.56607777474141      1.45664835637045
  H   -2.70813809049895     -2.54678048190301      2.94548249188314
  H   -2.59253390734013     -1.38797762719836      4.25998593739079
  H   -4.89269175579269     -1.57933439490380      3.29257270341522
  H   -4.24852020248603      0.05360060258737      3.28865102041263
  H   2.59448559494965      0.11279754131980     -0.07658758943480
  H   1.54431972753116      1.51222396560746      0.27522786625299
  H   2.28319271065456      1.33423184673666     -1.32865696814313
  H   -1.81624954377603      1.45684736239292     -1.11602832201407
  H   -3.50769117565960      1.81363556310703     -1.42934261025711
  H   -3.01762486483233      1.40068068096542      0.20252291170117
  H   -2.06374566727705     -1.15805041104781     -3.52789688352422
  H   -3.31963806912160     -2.38651855641051     -3.27640221727066
  H   -3.76090869774989     -0.76592414450297     -3.77912732256953
  H   -0.00491276287060     -2.16332552717143      2.88623331237864
  H   0.88283523324579     -0.13900467596979      1.60672458014005
  H   -6.41863318118604     -2.15295111066261      1.50994646258266
  H   -6.11921583662244     -3.15572617264686      0.11618745010431
  H   -4.57488252356972     -3.61421870332145      2.71097257534810
  H   -6.16313874046995     -4.28340449700443      2.44701148588671
  H   -2.55156847381853     -4.71776742996202      1.45953594597277
  H   -2.91124939589295     -5.71800534436352      0.06539270738576
  H   -2.19064416891873     -3.61019985761835     -0.76436073222414
  H   -3.92828509049375     -3.65969739510432     -1.05250707453787
  H   -2.02287267162938     -0.33000130134066      1.52411065924283
  H   -1.18886466777282      0.03184592475419      3.02242174100488
  H   -5.31553580205742     -5.38675291114382      0.34798203695204
  H   -4.62274961454986     -5.98701429715656      1.83849982784871

#P
  C   -3.62739527291306     -1.74085001062408     -3.89037150258197
  Al  -2.35379007089729     -2.22239818366736     -2.47270832236846
  O   -3.01988184284101     -3.14123528825968     -1.14591241269272
  C   -4.34466730873737     -3.56513344932570     -1.00823970007235
  C   -4.69728575302845     -3.76483875478251      0.45544672242003
  C   -4.73916000547273     -2.46591740218601      1.24407878994537
  C   -4.92422080734498     -2.70324071154186      2.73336389155875
  C   -4.97434382932061     -1.42905099849789      3.58331417997728
  C   -3.89120646261106     -0.41196434552224      3.30987001278038
  O   -4.07752863420025      0.58824343524327      2.67093635657762
  O   -2.12375625233884     -0.51614824492057     -1.56423704714681
  C   -1.33730045585992     -0.02278801552314     -0.76121225255550
  O   -1.68123049650085      1.15291071349121     -0.29335802024235
  C   -0.88044236858221      1.89038124595833      0.63450042053947
  C   -0.51853386096540     -2.78447457428268     -2.96325043756966
  C   -0.07927499827359     -0.72065833634813     -0.33946752842578
  C   -0.38511254384788     -1.87629580122272      0.62626474608637
  C   -0.86880874222385     -1.37256127095858      1.97447826330146
  C   -1.48603275813768     -2.44798300302307      2.85481848724101
  C   -2.09449887276823     -1.86158693596607      4.12561131442937
  O   -2.67171911514173     -0.57945639805386      3.87654365935771
  H   0.35725502766690     -1.12121995287655     -1.25382371563819
  H   -1.14299071331612     -2.52245333876231      0.17628154319770
  H   -2.24609863496183     -2.97333047177257      2.27423585486207
  H   -0.74314242787861     -3.19667132125461      3.14267122767191
  H   -2.81960919657966     -2.54000404344809      4.57903204013838
  H   -1.31687312587174     -1.66463910205238      4.86341729676368
  H   -0.08972171692573      2.41223688727885      0.09561121033607
  H   -0.46584476202956      1.25054672407116      1.40812839725900
  H   -1.56033370060817      2.60433663809873      1.08972588160942
  H   -3.16727636001628     -1.10399920668958     -4.65228335099233
  H   -4.02332949420972     -2.61948320868520     -4.41038169608058
  H   -4.48702080964172     -1.19400032993313     -3.49117907039913
  H   0.07364750486293     -1.97152872615259     -3.39814963041926
  H   0.05018026994065     -3.20590872660160     -2.12898825909031
  H   -0.55421763509127     -3.56587615265554     -3.72939562374266
  H   0.52078406724610     -2.47577387429435      0.73257959378814
  H   0.63076506900329     -0.02532337175235      0.10519235070612
  H   -4.96163591400702     -1.69297725291851      4.64405629124592
  H   -5.90516944857273     -0.90081509815972      3.38043835117683
  H   -4.13298071386565     -3.36552101764999      3.09010488813693
  H   -5.85757214612997     -3.24662489458581      2.90461836963576
  H   -3.95184182942651     -4.43905151489380      0.89205472609526
  H   -5.66460269718660     -4.27365664251186      0.52667750069764
  H   -4.50856315585756     -4.51252952181015     -1.54161357011393
  H   -5.04542050732430     -2.83850666084887     -1.44715208426738
  H   -0.05531166363131     -0.86992881265501      2.50890718001267
  H   -1.63481786572452     -0.61267381911620      1.81281775749207
  H   -3.81303907606113     -1.91543251699865      1.06009078990303
  H   -5.54202789179515     -1.82603834035598      0.86641712945594
